# Supplementary material for: Deficiency in APOBEC2 Leads to a Shift in Muscle Fiber Type, Diminished Body Mass, and Myopathy
Source: PubMed Central journal article supplement — J Biol Chem. 2009 Dec 18;285(10):7111–8. doi: 10.1074/jbc.M109.052977 (PMC2844160; doi:10.1074/jbc.m109.052977), 2009-12-18
Supplement: supp_M109.052977_Sup_Table_1_copy.pdf [file supp_M109.052977_Sup_Table_1_copy.pdf]

Sato, et al. Supplementary

Supplementary Table 1. Weight at weaning of Mdx/APOBEC2-deficient compared with control mice

|                | Genotype | Weight*    | #vs. Wt |         |
|----------------|----------|------------|---------|---------|
| <b>Males</b>   |          |            |         |         |
|                | WT       | 9.7 ±1.85  |         |         |
|                | Mdx      | 9.2 ±2.35  | ns      |         |
|                | A2       | 8.1 ±1.78  |         | p<0.005 |
|                | A2/Mdx   | 7.8 ±2.40  |         | p<0.05  |
| <b>Females</b> |          |            |         |         |
|                | Wt       | 9.9 ±2.09  |         |         |
|                | Mdx      | 9.0 ±2.09  | ns      |         |
|                | A2       | 8.1 ±1.48  |         | p<0.005 |
|                | A2/Mdx   | 8.4 ± 1.61 |         | p<0.05  |

pooled data from 21 days old mice from control, Mdx, APOBEC2-deficient and mixed Mdx/A2<sup>-/-</sup> parents. \*g (±SD), #p value of Student t-Test.
